# Supplementary material for: Effect of reactive organoclay on physicochemical properties of vegetable oil-based waterborne polyurethane nanocomposites
Source: Royal Society of Chemistry journal article supplement (doi:10.1039/c4ra14601h), 2015-01-01
Supplement: c4ra14601h1.pdf [file c4ra14601h1.pdf]

## Effect of reactive organoclay on physicochemical properties of vegetable oil-based waterborne polyurethane nanocomposites

T. Gurunathan<sup>1,2,\*</sup>, Smita Mohanty<sup>1,2</sup>, Sanjay K. Nayak<sup>1,2</sup>

<sup>1</sup>Advanced Research School for Technology and Product Simulation (ARSTPS), Central Institute of Plastics Engineering & Technology, Guindy, Chennai - 600032, India

<sup>2</sup>Laboratory for Advanced Research in Polymeric Materials (LARPM), Central Institute of Plastics Engineering and Technology, Bhubaneswar -751024, India

\*Address correspondence to:

T. Gurunathan,

Central Institute of Plastics Engineering & Technology, Guindy, Chennai - 600032, India

E-mail: [jguru001@gamil.com](mailto:jguru001@gamil.com)

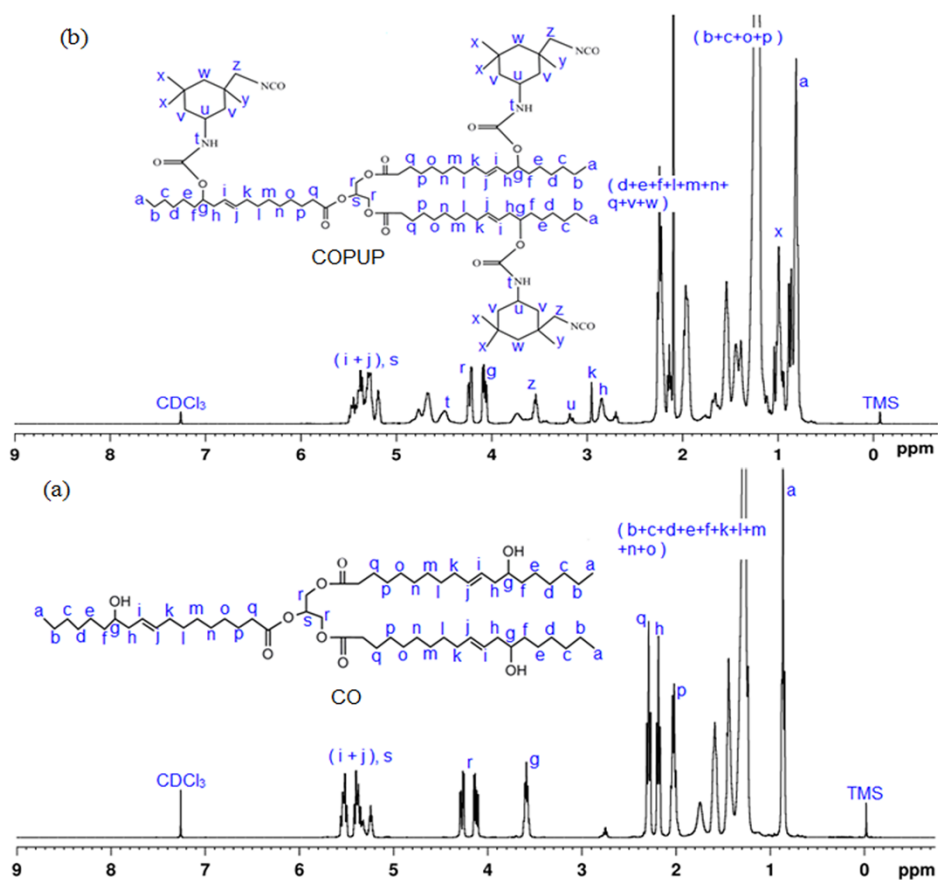

Fig. S1 <sup>1</sup>H-NMR spectra of CO (a) and castor oil-based PUP (b)

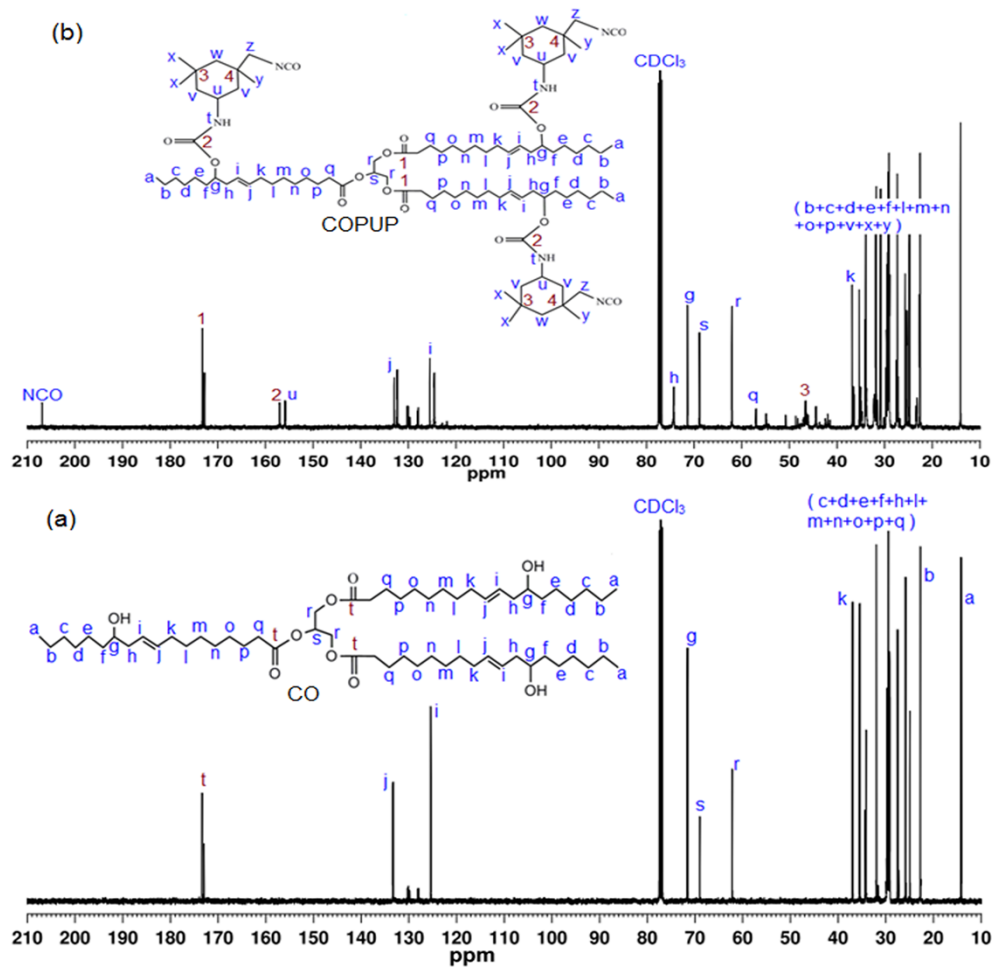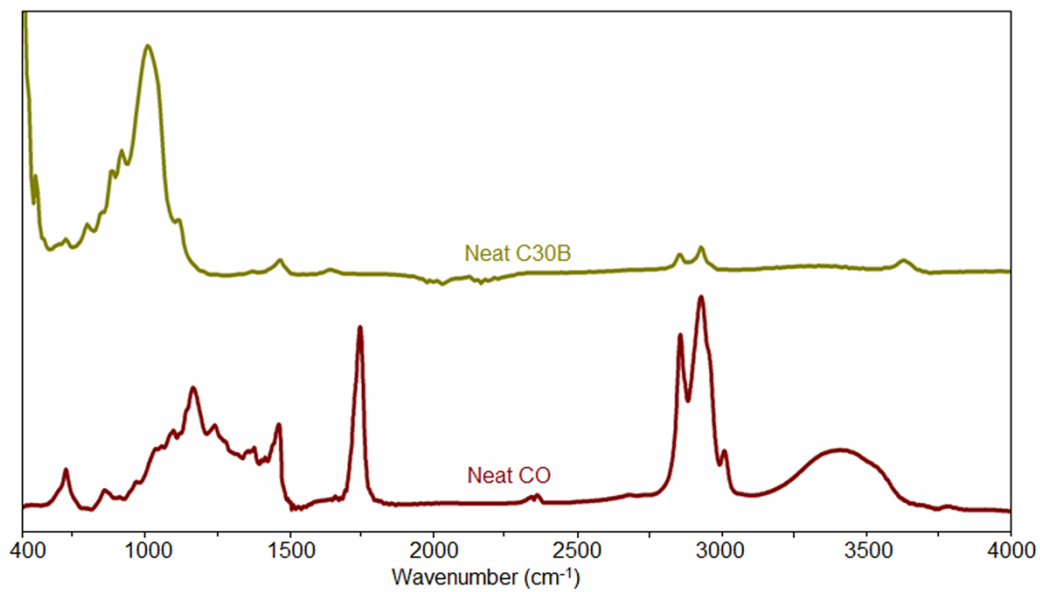

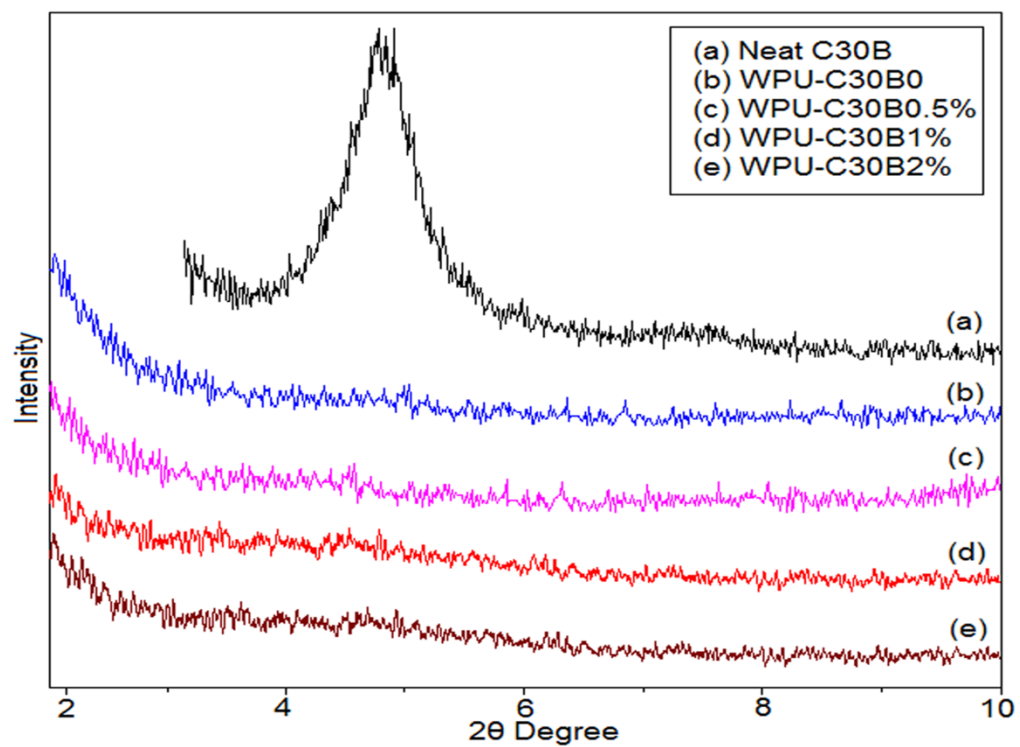

Fig. S4 WAXD intensity profiles of neat C30B and WPU-C30B nanocomposites.

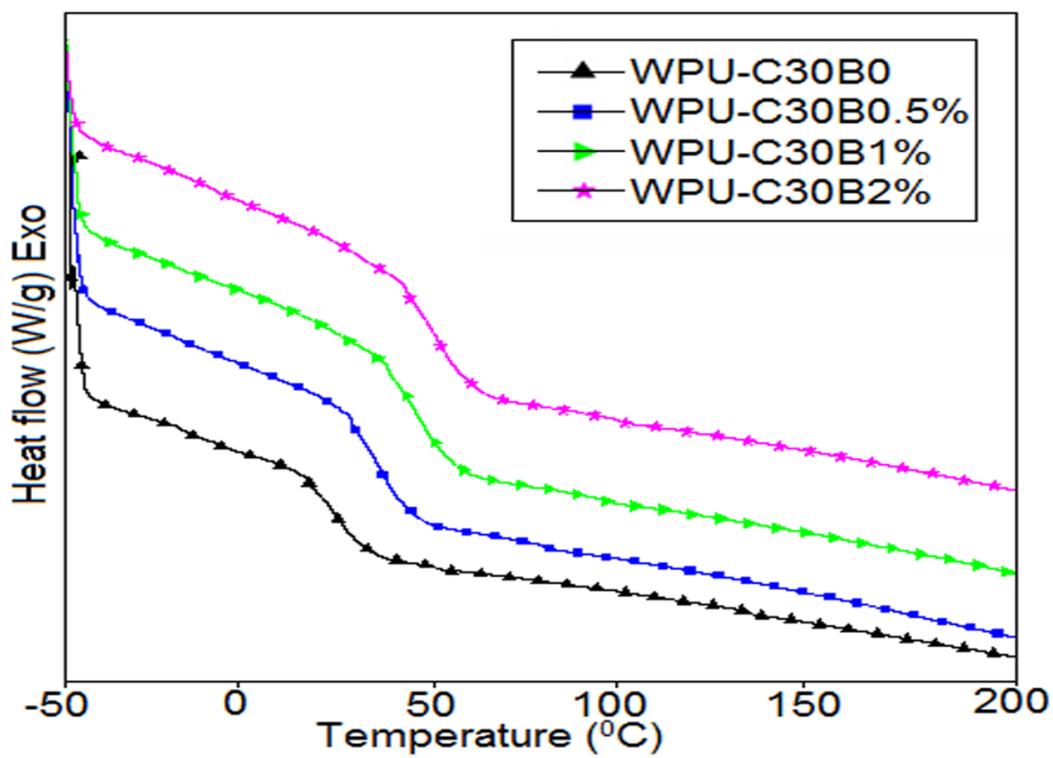

Fig. S5 DSC thermograms of WPU-C30B0 and WPU-C30B nanocomposites

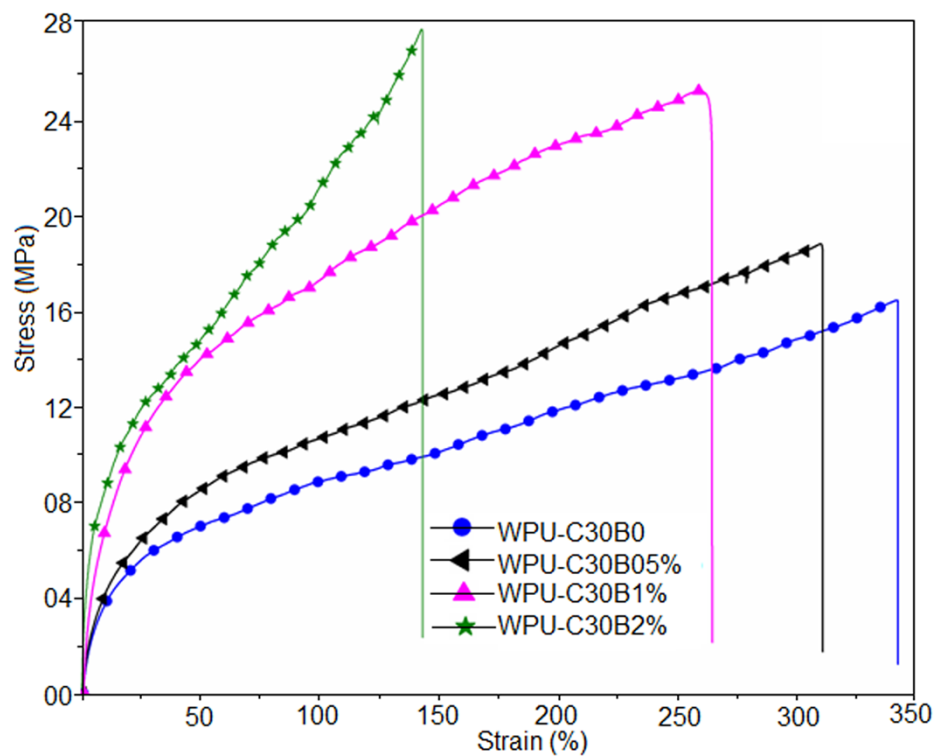

Fig. S6 Tensile stress-strain curves for the WPU-C30B nanocomposites
